# Supplementary material for: Replacing school and out-of-school sedentary behaviors with physical activity and its associations with adiposity in children and adolescents: a compositional isotemporal substitution analysis
Source: Springer Nature journal article supplement (doi:10.1186/s12199-021-00932-6), 2021-01-27

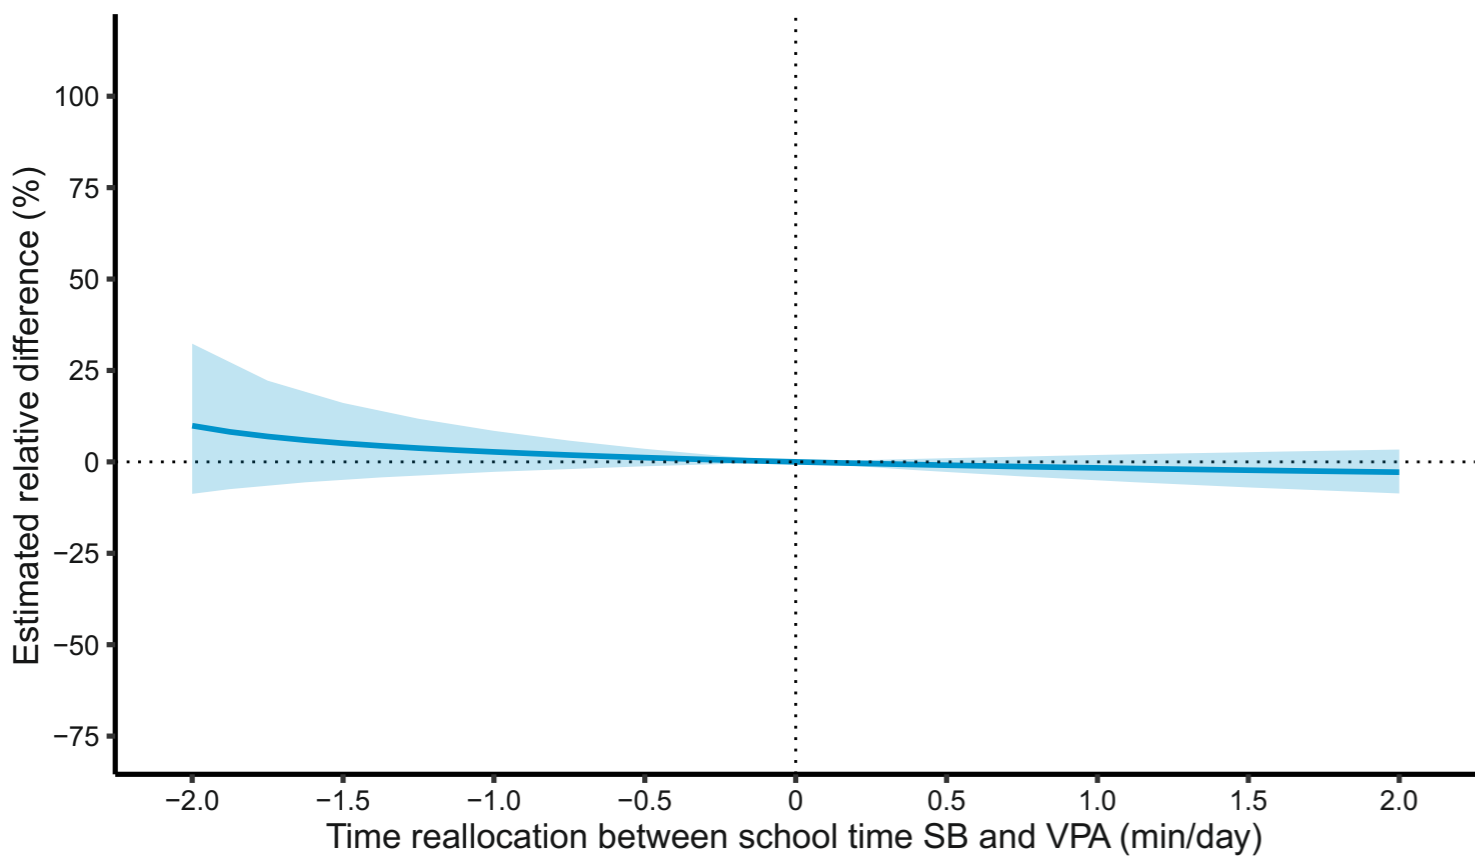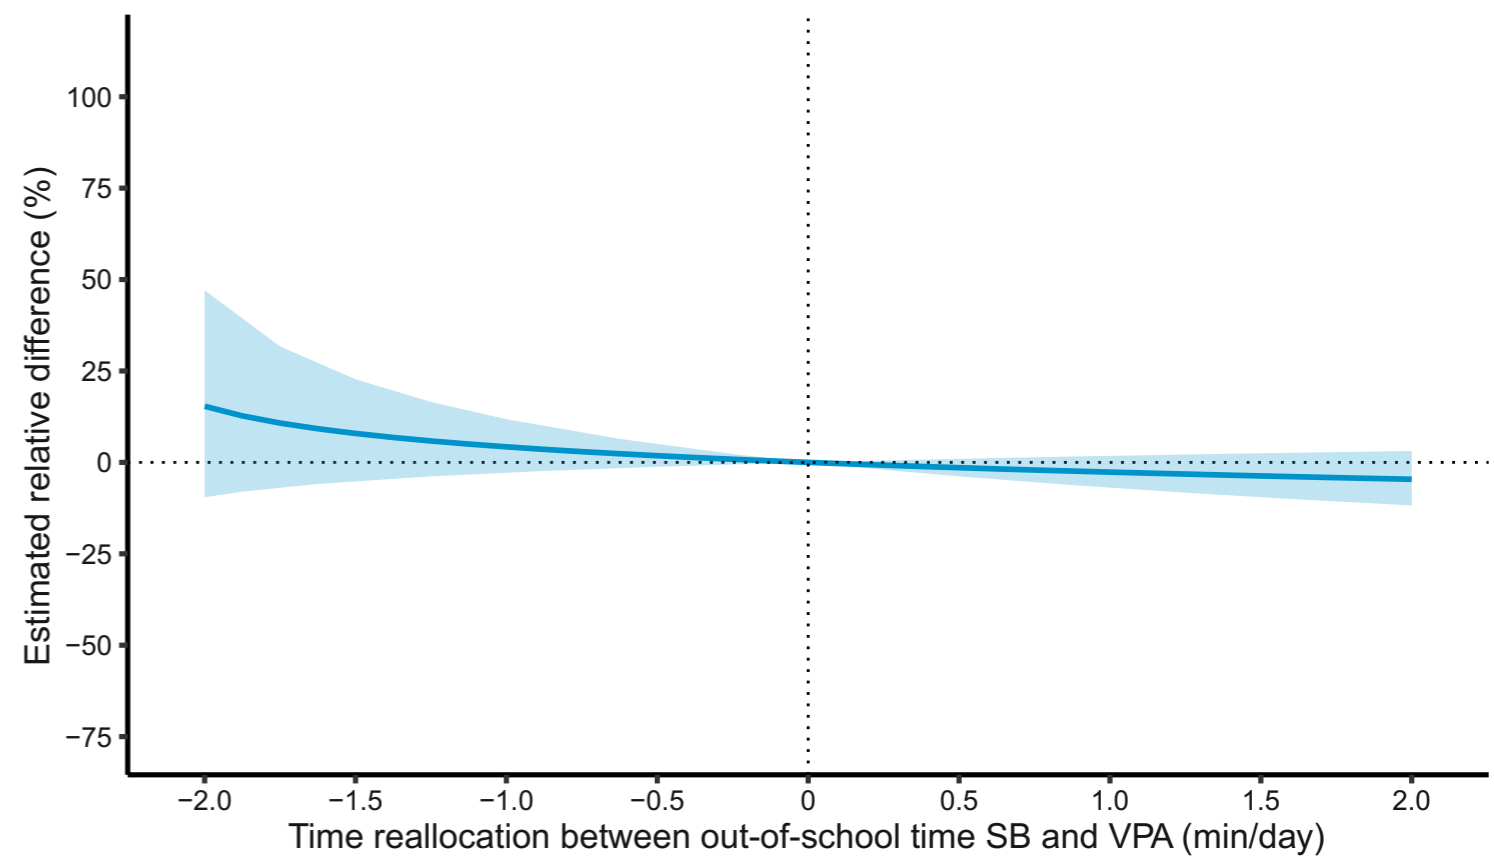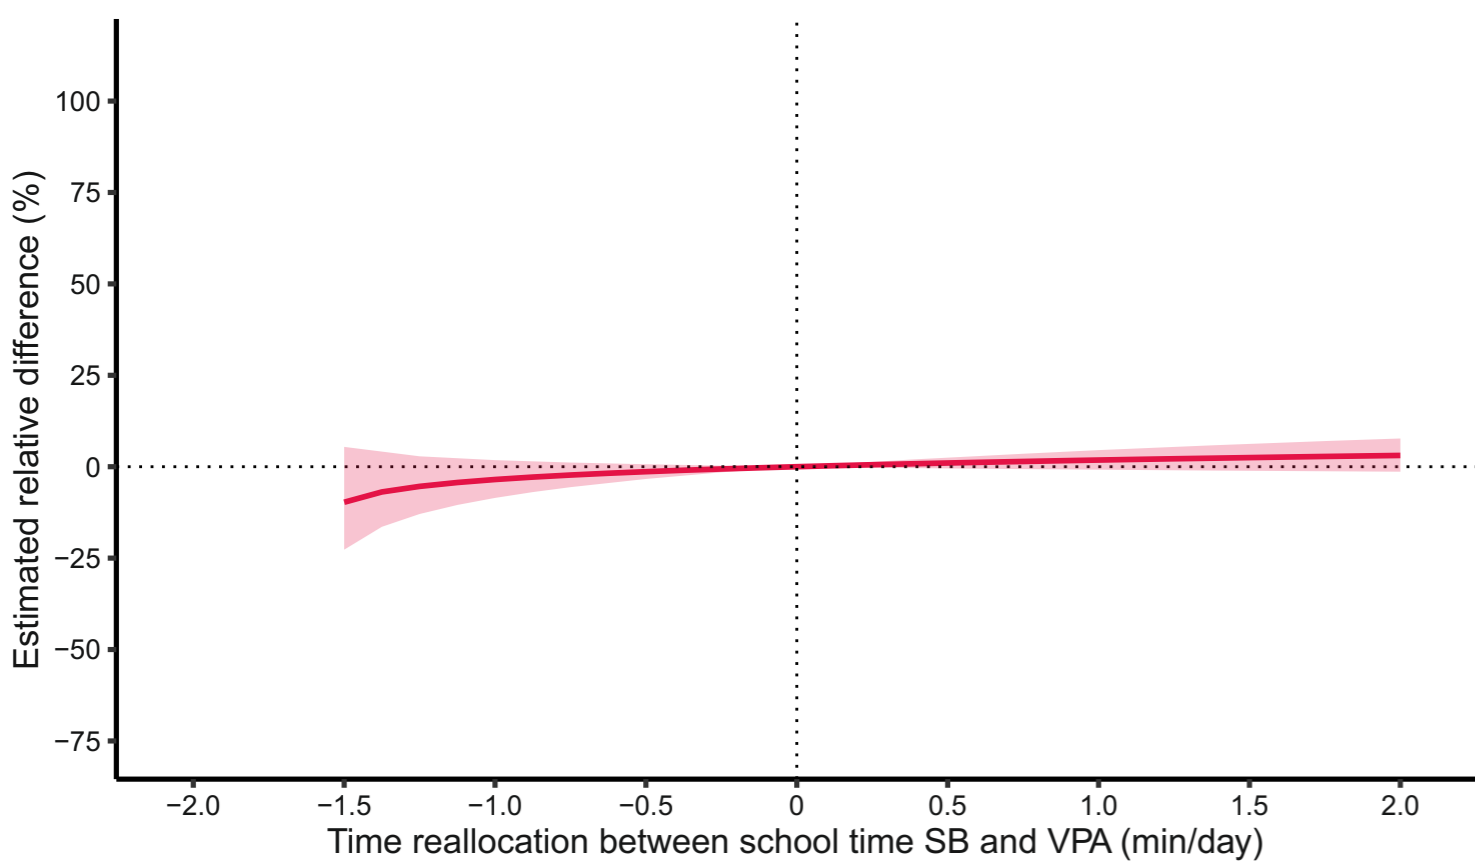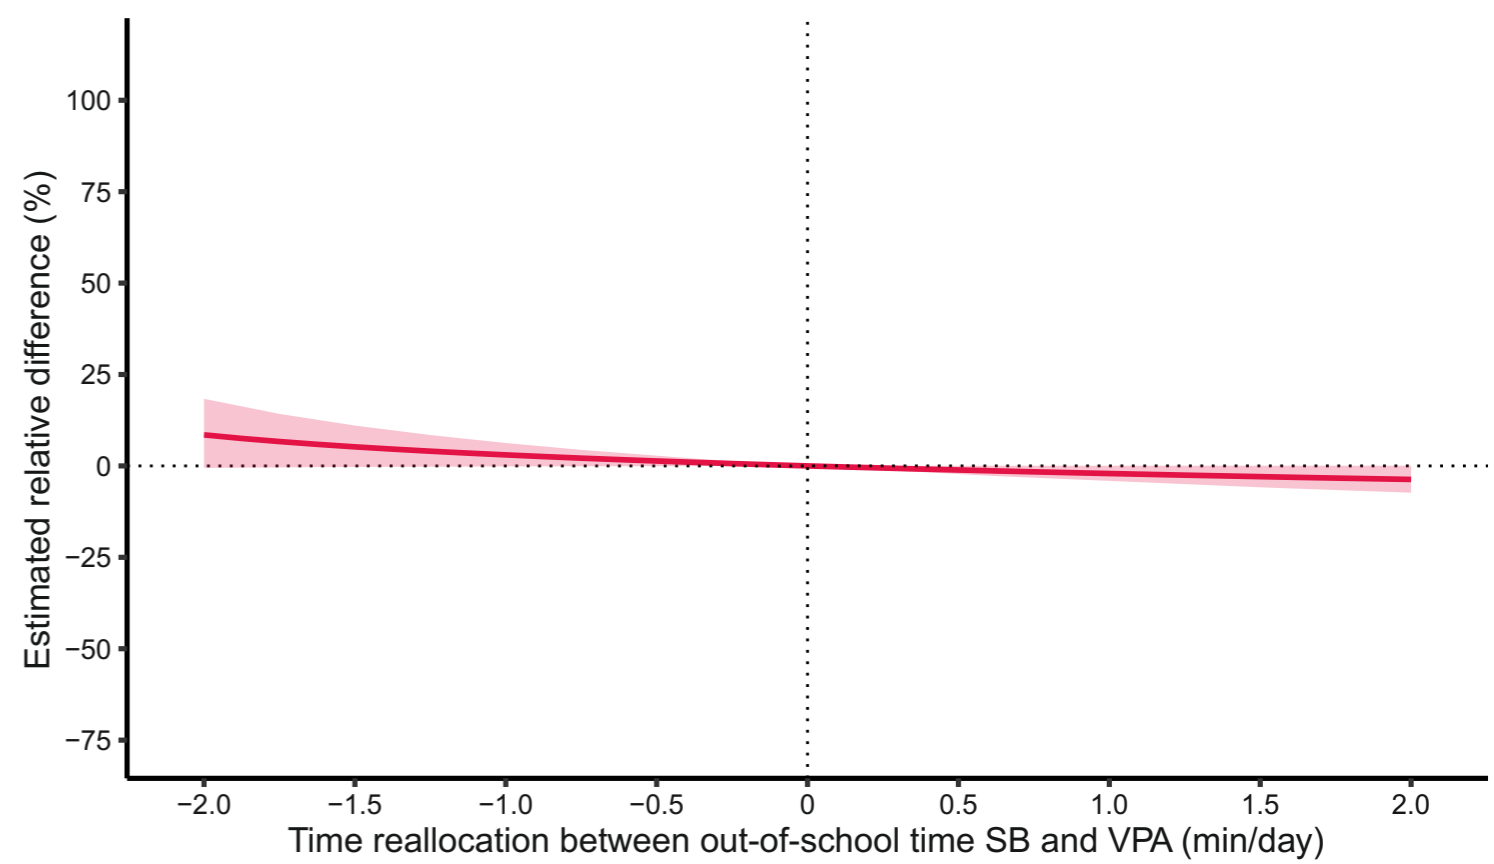

Supplement: MOESM2 [file 18804456]
